# Supplementary material
Source: MDPI journal article supplement (https://www.mdpi.com/2073-4395/13/1/261)
Supplement: s1 [file s1]

**Long-term effects of mineral and manure fertilization on rice grain yield, yield stability and bacterial community in a double rice-cropping system**

Jin Li<sup>1,2#</sup>, Kai-lou Liu<sup>3#</sup>, Jiang Xie<sup>2</sup>, Yu Jiang<sup>4</sup>, Guo-qiang Deng<sup>2</sup>, Da-ming Li<sup>3</sup>, Xian-jiao Guan<sup>2</sup>, Xihuang Liang<sup>2,5</sup>, Xian-mao Chen<sup>2,5</sup>, Cai-fei Qiu<sup>2</sup>, Yin-fei Qian<sup>2</sup>, Wen-jian Xia<sup>2</sup>, Jia Liu<sup>2</sup>, Chun-rui Peng<sup>2</sup>, Stephen M. Bell<sup>6</sup>, Ji Chen<sup>7,8,9\*</sup>, Jin Chen<sup>2,5\*</sup>

<sup>1</sup>*Nanchang Normal University, Nanchang, 330032, China*

<sup>2</sup>*Soil and Fertilizer & Resources and Environment Institute, Jiangxi Academy of Agricultural Sciences / Key Laboratory of Crop Ecophysiology and Farming System for the Middle and Lower Reaches of the Yangtze River, Ministry of Agriculture and Rural Affairs / National Engineering and Technology Research Center for Red Soil Improvement/National Agricultural Experimental Station for Agricultural Environment of Yichun, Nanchang, 330200, China*

<sup>3</sup>*Jiangxi Institute of Red Soil/National Engineering and Technology Research Center for Red Soil Improvement, Nanchang, 330046, China*

<sup>4</sup>*Jiangsu Collaborative Innovation Center for Modern Crop Production/National Engineering and Technology Center for Information Agriculture/Key Laboratory of Crop Physiology and Ecology in Southern China, Nanjing Agricultural University, Nanjing, 210095, China*

<sup>5</sup>*Jinggangshan Institute of Red Soil / Jinggangshan Branch of Jiangxi Academy of Agricultural Sciences, Ji'an, 343016, China*

<sup>6</sup>*Institute of Environmental Science and Technology (ICTA), Universitat Autònoma de Barcelona (UAB), 08193 Bellaterra, Spain*

<sup>7</sup>*Department of Agroecology, Aarhus University, Blichers Allé 20, 8830 Tjele, Denmark*

<sup>8</sup>*Aarhus University Centre for Circular Bioeconomy, Aarhus University, 8830 Tjele, Denmark.*

<sup>9</sup>*iCLIMATE Interdisciplinary Centre for Climate Change, Aarhus University, 4000 Roskilde, Denmark.*

*Correspondence Chen Jin, Tel: +86-791-87832356, E-mail: chenjin2004777@163.com*

*Correspondence Chen Ji, Tel: +45-71374531, E-mail: ji.chen@agro.au.dk*

*# These authors contributed equally to this study.*

## Supplementary information.

**Table S1. Linear mixed-effects models of the effects of mineral and manure fertilization, year and their interactive effects on rice grain yield production and yield stability.**

| Variable           | Treat      | numDF | denDF | F          | p      |
|--------------------|------------|-------|-------|------------|--------|
| Grain Yield        | Intercept  | 1     | 288   | 3732.906   | <.0001 |
|                    | Treat      | 3     | 6     | 656.155    | <.0001 |
|                    | Year       | 36    | 288   | 82.668     | <.0001 |
|                    | Treat:Year | 108   | 288   | 7.676      | <.0001 |
|                    | Intercept  | 1     | 6     | 3754.533   | <.0001 |
| Yield stability    | Treat      | 3     | 6     | 23.818     | 0.001  |
| Annual grain yield |            |       |       |            |        |
| 1981               | Intercept  | 1     | 6     | 6239.273   | <.0001 |
|                    | Treat      | 3     | 6     | 464.048    | <.0001 |
| 1982               | Intercept  | 1     | 6     | 3651.322   | <.0001 |
|                    | Treat      | 3     | 6     | 375.680    | <.0001 |
| 1983               | Intercept  | 1     | 6     | 7187.887   | <.0001 |
|                    | Treat      | 3     | 6     | 185.282    | <.0001 |
| 1984               | Intercept  | 1     | 6     | 243602.600 | <.0001 |
|                    | Treat      | 3     | 6     | 2504.350   | <.0001 |
| 1985               | Intercept  | 1     | 6     | 3329.482   | <.0001 |
|                    | Treat      | 3     | 6     | 187.695    | <.0001 |
| 1986               | Intercept  | 1     | 6     | 2685.992   | <.0001 |
|                    | Treat      | 3     | 6     | 66.113     | <.0001 |
| 1987               | Intercept  | 1     | 6     | 786.944    | <.0001 |
|                    | Treat      | 3     | 6     | 113.589    | <.0001 |
| 1988               | Intercept  | 1     | 6     | 2536.643   | <.0001 |
|                    | Treat      | 3     | 6     | 141.381    | <.0001 |
| 1989               | Intercept  | 1     | 6     | 1669.506   | <.0001 |
|                    | Treat      | 3     | 6     | 39.490     | <.0001 |
| 1990               | Intercept  | 1     | 6     | 4806.172   | <.0001 |
|                    | Treat      | 3     | 6     | 99.035     | <.0001 |
| 1991               | Intercept  | 1     | 6     | 11936.521  | <.0001 |
|                    | Treat      | 3     | 6     | 792.431    | <.0001 |
| 1992               | Intercept  | 1     | 6     | 243.842    | <.0001 |
|                    | Treat      | 3     | 6     | 78.247     | <.0001 |
| 1993               | Intercept  | 1     | 6     | 6238.813   | <.0001 |
|                    | Treat      | 3     | 6     | 79.390     | <.0001 |
| 1994               | Intercept  | 1     | 6     | 2777.719   | <.0001 |
|                    | Treat      | 3     | 6     | 96.992     | <.0001 |
| 1995               | Intercept  | 1     | 6     | 820.269    | <.0001 |
|                    | Treat      | 3     | 6     | 116.208    | <.0001 |
| 1996               | Intercept  | 1     | 6     | 6664.571   | <.0001 |

|      |           |   |   |          |        |
|------|-----------|---|---|----------|--------|
|      | Treat     | 3 | 6 | 133.910  | <.0001 |
|      | Intercept | 1 | 6 | 3677.617 | <.0001 |
| 1997 | Treat     | 3 | 6 | 500.585  | <.0001 |
|      | Intercept | 1 | 6 | 2202.641 | <.0001 |
| 1998 | Treat     | 3 | 6 | 599.371  | <.0001 |
|      | Intercept | 1 | 6 | 1834.578 | <.0001 |
| 1999 | Treat     | 3 | 6 | 99.031   | <.0001 |
|      | Intercept | 1 | 6 | 2030.083 | <.0001 |
| 2000 | Treat     | 3 | 6 | 89.557   | <.0001 |
|      | Intercept | 1 | 6 | 1084.485 | <.0001 |
| 2001 | Treat     | 3 | 6 | 28.961   | 0.001  |
|      | Intercept | 1 | 6 | 2415.187 | <.0001 |
| 2002 | Treat     | 3 | 6 | 246.450  | <.0001 |
|      | Intercept | 1 | 6 | 9180.642 | <.0001 |
| 2003 | Treat     | 3 | 6 | 185.903  | <.0001 |
|      | Intercept | 1 | 6 | 5187.608 | <.0001 |
| 2004 | Treat     | 3 | 6 | 130.523  | <.0001 |
|      | Intercept | 1 | 6 | 9563.534 | <.0001 |
| 2005 | Treat     | 3 | 6 | 65.385   | <.0001 |
|      | Intercept | 1 | 6 | 4634.341 | <.0001 |
| 2006 | Treat     | 3 | 6 | 126.818  | <.0001 |
|      | Intercept | 1 | 6 | 8673.201 | <.0001 |
| 2007 | Treat     | 3 | 6 | 155.352  | <.0001 |
|      | Intercept | 1 | 6 | 6406.287 | <.0001 |
| 2008 | Treat     | 3 | 6 | 159.365  | <.0001 |
|      | Intercept | 1 | 6 | 2043.649 | <.0001 |
| 2009 | Treat     | 3 | 6 | 145.909  | <.0001 |
|      | Intercept | 1 | 6 | 7093.342 | <.0001 |
| 2010 | Treat     | 3 | 6 | 116.179  | <.0001 |
|      | Intercept | 1 | 6 | 202.463  | <.0001 |
| 2011 | Treat     | 3 | 6 | 40.532   | <.0001 |
|      | Intercept | 1 | 6 | 6989.801 | <.0001 |
| 2012 | Treat     | 3 | 6 | 157.752  | <.0001 |
|      | Intercept | 1 | 6 | 3304.528 | <.0001 |
| 2013 | Treat     | 3 | 6 | 68.097   | <.0001 |
|      | Intercept | 1 | 6 | 2553.496 | <.0001 |
| 2014 | Treat     | 3 | 6 | 64.234   | <.0001 |
|      | Intercept | 1 | 6 | 1089.135 | <.0001 |
| 2015 | Treat     | 3 | 6 | 43.236   | <.0001 |
|      | Intercept | 1 | 6 | 2670.645 | <.0001 |
| 2016 | Treat     | 3 | 6 | 41.697   | <.0001 |
|      | Intercept | 1 | 6 | 1550.818 | <.0001 |
| 2017 | Treat     | 3 | 6 | 84.541   | <.0001 |

---

numDF, numerator degree of freedom. denDF, denominator degree of freedom. Linear mixed-effects

models were conducted when all year observations are pooled together or separately for each year. For all observations, mineral and manure fertilization, year and their interactions were considered as fixed factors, while block and plot were considered as random factors. For observations from each year, mineral and manure fertilization was considered as fixed factors, while block and plot were considered as random factors.

**Table S2. Linear mixed-effects models of the effects of mineral and manure fertilization on soil pH, soil EC, available nitrogen, available phosphorus, available potassium, ammonium, nitrate, and ammonium:nitrate.**

| Variable             | Treat     | numDF | denDF | F         | p      |
|----------------------|-----------|-------|-------|-----------|--------|
| Soil pH              | Intercept | 1     | 6     | 31726.400 | <.0001 |
|                      | Treat     | 3     | 6     | 10.250    | 0.009  |
| Soil EC              | Intercept | 1     | 6     | 588.000   | <.0001 |
|                      | Treat     | 3     | 6     | 11.783    | 0.006  |
| Available nitrogen   | Intercept | 1     | 6     | 5200.900  | <.0001 |
|                      | Treat     | 3     | 6     | 35.666    | <.0001 |
| Available phosphorus | Intercept | 1     | 6     | 8395.121  | <.0001 |
|                      | Treat     | 3     | 6     | 3456.947  | <.0001 |
| Available potassium  | Intercept | 1     | 6     | 9244.472  | <.0001 |
|                      | Treat     | 3     | 6     | 145.946   | <.0001 |
| Ammonium             | Intercept | 1     | 6     | 638.556   | <.0001 |
|                      | Treat     | 3     | 6     | 83.250    | <.0001 |
| Nitrate              | Intercept | 1     | 6     | 1318.078  | <.0001 |
|                      | Treat     | 3     | 6     | 132.861   | <.0001 |
| Ammonium:Nitrate     | Intercept | 1     | 6     | 60.802    | <.0001 |
|                      | Treat     | 3     | 6     | 35.617    | <.0001 |

numDF, numerator degree of freedom. denDF, denominator degree of freedom. Linear mixed-effects models were conducted, mineral and manure fertilization was considered as fixed factor, while block and plot were considered as random factor.

**Table S3. Linear mixed-effects models of the effects of mineral and manure fertilization on microbial biomass carbon (MBC), microbial biomass nitrogen (MBN), MBC:MBN, soil organic carbon (SOC), soil total nitrogen (TN), and SOC:TN.**

| Variable                   | Treat     | numDF | denDF | F         | p      |
|----------------------------|-----------|-------|-------|-----------|--------|
| Microbial biomass carbon   | Intercept | 1     | 6     | 3770.705  | <.0001 |
|                            | Treat     | 3     | 6     | 107.626   | <.0001 |
| Microbial biomass nitrogen | Intercept | 1     | 6     | 396.506   | <.0001 |
|                            | Treat     | 3     | 6     | 3.706     | 0.081  |
| MBC:MBN                    | Intercept | 1     | 6     | 303.800   | <.0001 |
|                            | Treat     | 3     | 6     | 8.044     | 0.016  |
| Soil organic carbon        | Intercept | 1     | 6     | 5342.673  | <.0001 |
|                            | Treat     | 3     | 6     | 31.604    | 0.001  |
| Soil total nitrogen        | Intercept | 1     | 6     | 16905.457 | <.0001 |
|                            | Treat     | 3     | 6     | 366.784   | <.0001 |
| SOC:TN                     | Intercept | 1     | 6     | 6325.676  | <.0001 |
|                            | Treat     | 3     | 6     | 1.506     | 0.306  |

numDF, numerator degree of freedom. denDF, denominator degree of freedom. Linear mixed-effects models were conducted, mineral and manure fertilization was considered as fixed factor, while block and plot were considered as random factor.

**Table S4. Linear mixed-effects models of the effects of mineral and manure fertilization on soil bacterial richness, diversity and community composition.**

| Variable         | Treat     | numDF | denDF | F            | p      |
|------------------|-----------|-------|-------|--------------|--------|
| OTU              | Intercept | 1     | 6     | 235.061      | <.0001 |
|                  | Treat     | 3     | 6     | 2.489        | 0.158  |
| Chao1            | Intercept | 1     | 6     | 197.466      | <.0001 |
|                  | Treat     | 3     | 6     | 2.549        | 0.152  |
| Shannon          | Intercept | 1     | 6     | 50238.150    | <.0001 |
|                  | Treat     | 3     | 6     | 1.770        | 0.252  |
| Simpson          | Intercept | 1     | 6     | 81508496.000 | <.0001 |
|                  | Treat     | 3     | 6     | 4.000        | 0.057  |
| Proteobacteria   | Intercept | 1     | 6     | 1562.572     | <.0001 |
|                  | Treat     | 3     | 6     | 0.973        | 0.465  |
| Acidobacteria    | Intercept | 1     | 6     | 595.911      | <.0001 |
|                  | Treat     | 3     | 6     | 0.157        | 0.921  |
| Chloroflexi      | Intercept | 1     | 6     | 1799.097     | <.0001 |
|                  | Treat     | 3     | 6     | 0.657        | 0.608  |
| Nitrospirae      | Intercept | 1     | 6     | 174.652      | <.0001 |
|                  | Treat     | 3     | 6     | 2.122        | 0.199  |
| Firmicutes       | Intercept | 1     | 6     | 12.746       | 0.012  |
|                  | Treat     | 3     | 6     | 1.540        | 0.298  |
| Bacteroidetes    | Intercept | 1     | 6     | 116.352      | <.0001 |
|                  | Treat     | 3     | 6     | 4.285        | 0.062  |
| Actinobacteria   | Intercept | 1     | 6     | 221.061      | <.0001 |
|                  | Treat     | 3     | 6     | 17.901       | 0.002  |
| Chlorobi         | Intercept | 1     | 6     | 930.577      | <.0001 |
|                  | Treat     | 3     | 6     | 0.802        | 0.537  |
| Gemmatimonadetes | Intercept | 1     | 6     | 88.579       | <.0001 |
|                  | Treat     | 3     | 6     | 10.538       | 0.008  |
| Verrucomicrobia  | Intercept | 1     | 6     | 175.346      | <.0001 |
|                  | Treat     | 3     | 6     | 0.299        | 0.825  |

numDF, numerator degree of freedom. denDF, denominator degree of freedom. Linear mixed-effects models were conducted, mineral and manure fertilization was considered as fixed factor, while block and plot were considered as random factors.

**Table S5. Mantel analysis of the relationship between bacterial community structure and soil characteristics, grain yield and yield stability.**

| Variable                                                   | OTU      |          | Shannon  |          | Simpson  |          | Chao1    |          | Community |          |
|------------------------------------------------------------|----------|----------|----------|----------|----------|----------|----------|----------|-----------|----------|
|                                                            | <i>R</i> | <i>P</i> | <i>R</i> | <i>P</i> | <i>R</i> | <i>P</i> | <i>R</i> | <i>P</i> | <i>R</i>  | <i>P</i> |
| AN                                                         | 0.080    | 0.279    | 0.021    | 0.413    | -0.086   | 0.674    | 0.110    | 0.203    | 0.073     | 0.306    |
| NH <sub>4</sub> <sup>+</sup>                               | 0.006    | 0.419    | 0.174    | 0.187    | -0.059   | 0.543    | 0.106    | 0.226    | -0.101    | 0.657    |
| NO <sub>3</sub> <sup>-</sup>                               | -0.027   | 0.520    | 0.120    | 0.242    | 0.053    | 0.312    | 0.033    | 0.383    | -0.085    | 0.653    |
| NH <sub>4</sub> <sup>+</sup> :NO <sub>3</sub> <sup>-</sup> | 0.055    | 0.336    | 0.140    | 0.228    | -0.060   | 0.520    | 0.161    | 0.165    | -0.108    | 0.637    |
| AP                                                         | 0.186    | 0.118    | 0.162    | 0.147    | -0.111   | 0.769    | 0.235    | 0.057    | -0.027    | 0.523    |
| AK                                                         | 0.171    | 0.131    | 0.145    | 0.164    | -0.043   | 0.553    | 0.143    | 0.149    | -0.081    | 0.286    |
| MBC                                                        | 0.094    | 0.221    | 0.157    | 0.141    | -0.039   | 0.544    | 0.111    | 0.182    | 0.167     | 0.126    |
| MBN                                                        | 0.425    | 0.023    | 0.532    | 0.009    | -0.157   | 0.804    | 0.282    | 0.050    | 0.016     | 0.400    |
| MBC:MBN                                                    | 0.077    | 0.611    | -0.054   | 0.547    | -0.200   | 0.915    | 0.032    | 0.368    | 0.006     | 0.436    |
| pH                                                         | -0.032   | 0.550    | -0.203   | 0.979    | -0.143   | 0.900    | 0.078    | 0.237    | 0.148     | 0.138    |
| EC                                                         | 0.115    | 0.257    | 0.101    | 0.278    | -0.120   | 0.705    | 0.098    | 0.243    | -0.100    | 0.641    |
| SOC                                                        | 0.283    | 0.033    | 0.102    | 0.210    | -0.040   | 0.547    | 0.262    | 0.039    | 0.174     | 0.102    |
| TN                                                         | 0.228    | 0.076    | 0.181    | 0.123    | -0.062   | 0.612    | 0.248    | 0.049    | 0.096     | 0.247    |
| SOC:TN                                                     | 0.072    | 0.303    | -0.220   | 0.884    | 0.245    | 0.120    | -0.134   | 0.817    | 0.543     | 0.006    |
| Yield                                                      | 0.393    | 0.019    | -0.107   | 0.693    | -0.052   | 0.556    | 0.354    | 0.013    | 0.118     | 0.235    |
| Yield stability                                            | 0.228    | 0.095    | -0.149   | 0.803    | 0.236    | 0.083    | 0.236    | 0.083    | -0.057    | 0.579    |

AN, available nitrogen. AP, available nitrogen. AK, available nitrogen. MBC, microbial biomass carbon. MBN, microbial biomass nitrogen. SOC, soil organic carbon. TN, total nitrogen.

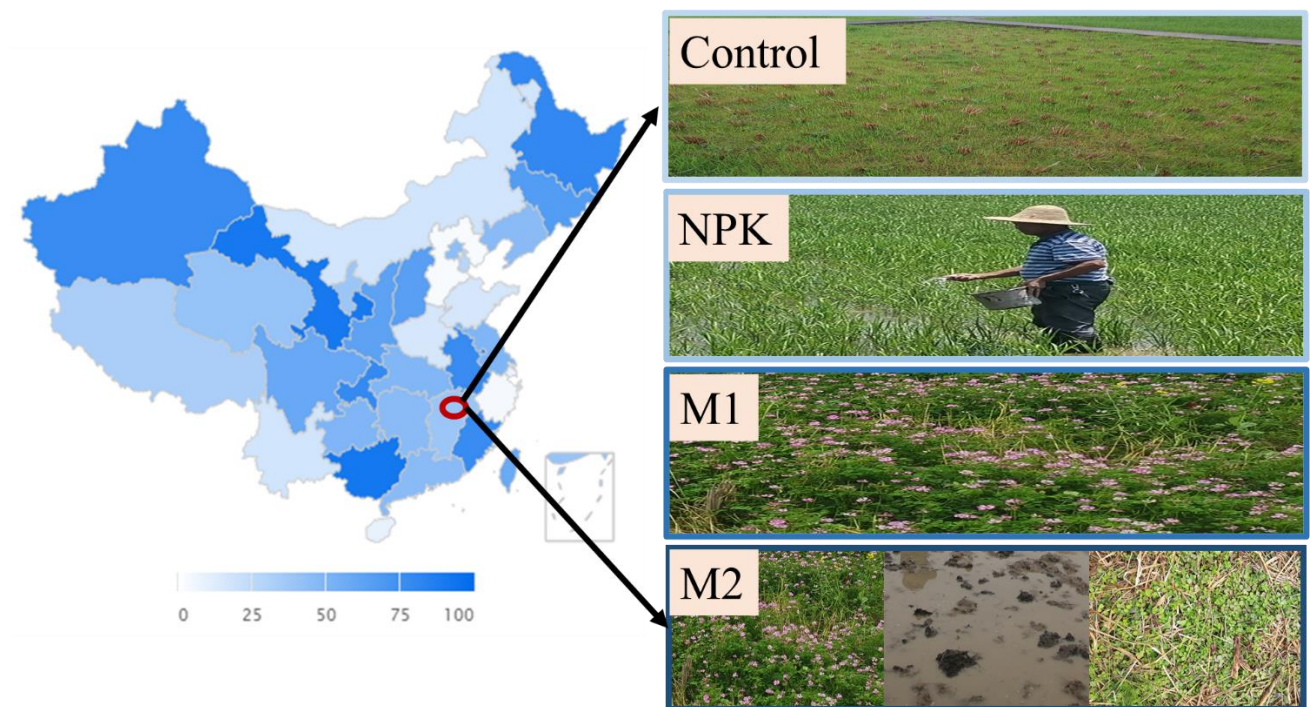

**Figure S1.** The study site and the experimental design.

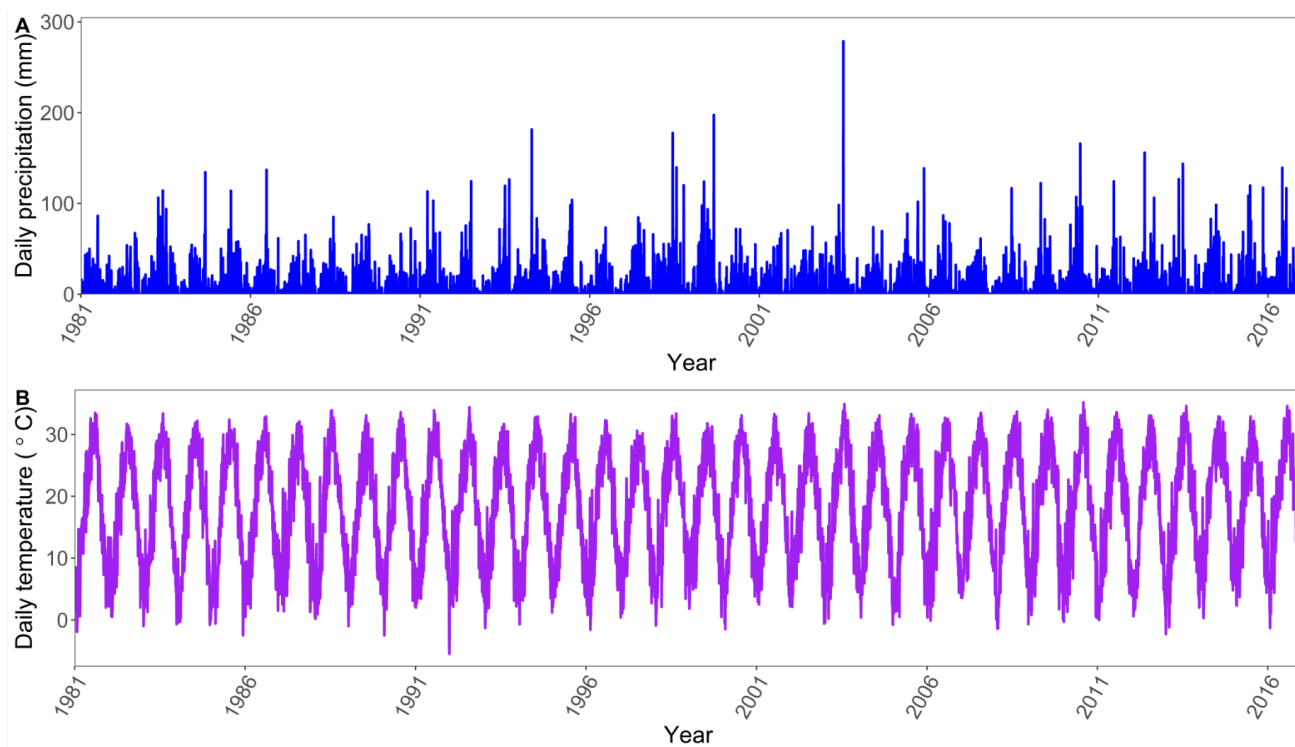

**Figure S2. Daily (A) precipitation and (B) temperature at the study site from 1981 to 2017.**

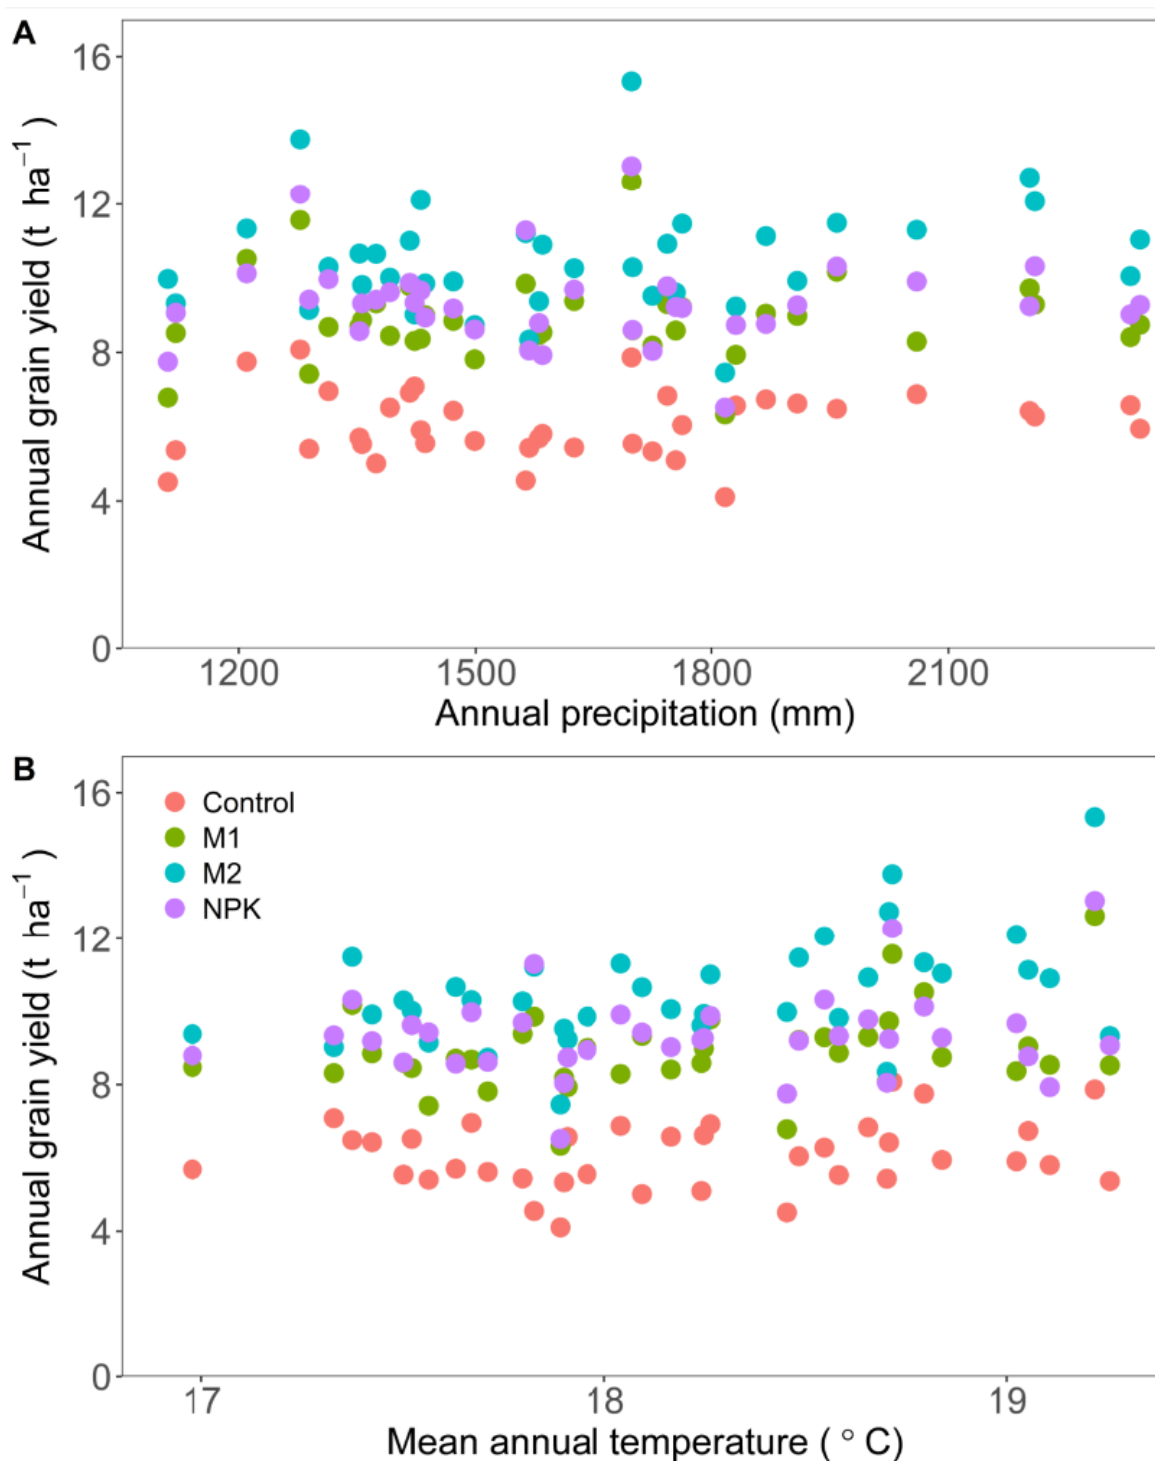

**Figure S3. Relationship between annual grain yield and (A) annual precipitation and (B) mean annual temperature.** There were four treatments, no application of fertilizer (Control), application of nitrogen-phosphorus-potassium fertilizer in early rice (NPK), NPK plus green manure in early rice (M1), NPK plus green manure in early rice and farmyard manure in late rice and rice straw return in winter (M2).

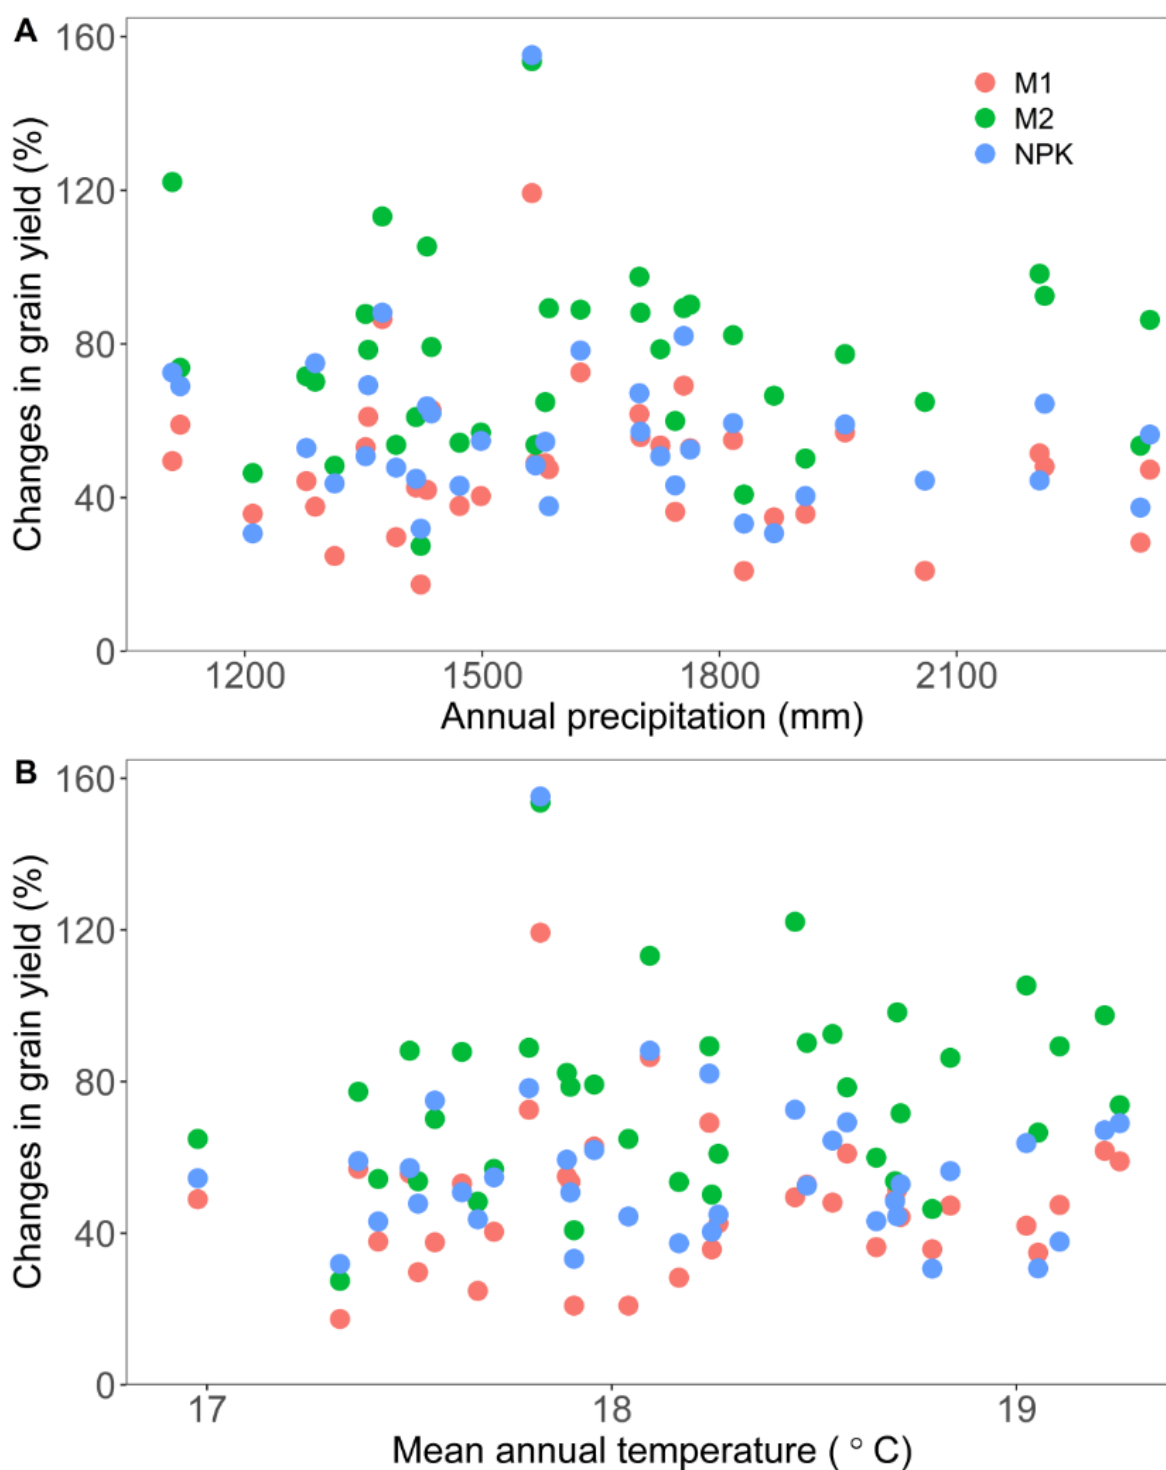

**Figure S4. Relationship between fertilization-induced changes in annual grain yield and (A) annual precipitation and (B) mean annual temperature.** There were four treatments, no application of fertilizer (Control), application of nitrogen-phosphorus-potassium fertilizer in early rice (NPK), NPK plus green manure in early rice (M1), NPK plus green manure in early rice and farmyard manure in late rice and rice straw return in winter (M2).

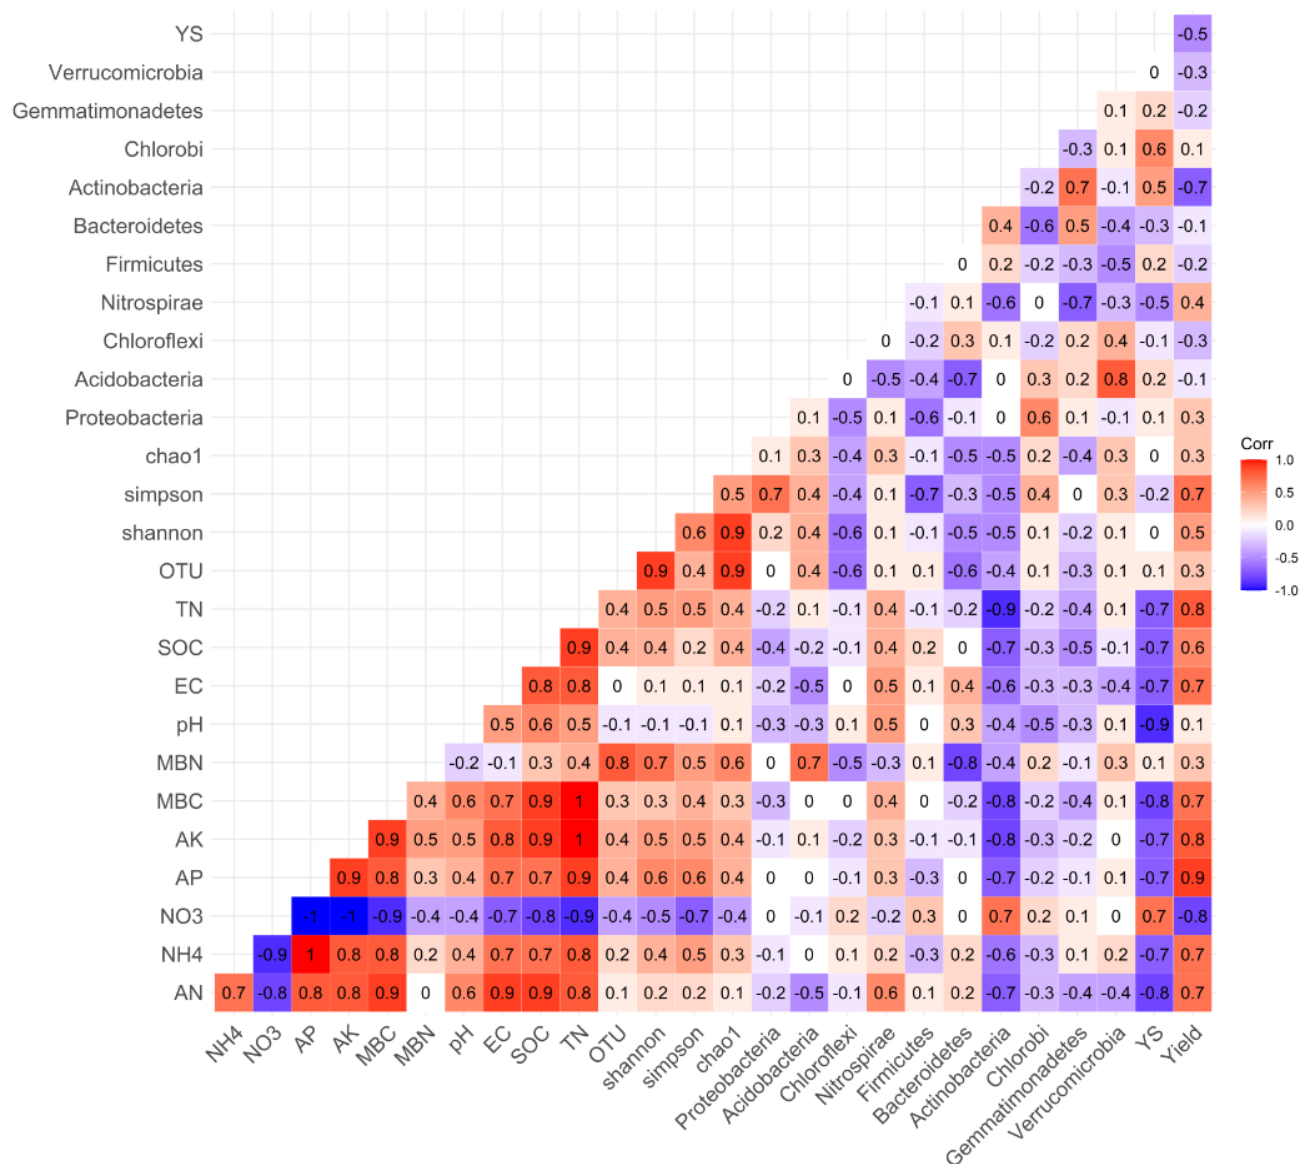

**Figure S5. Correlations between mineral- and manure-induced changes between the studied variables.** AN, available nitrogen. AP, available nitrogen. AK, available nitrogen. MBC, microbial biomass carbon. MBN, microbial biomass nitrogen. SOC, soil organic carbon. TN, total nitrogen. YS, yield stability.
